# Supplementary material for: A Single Infusion of Polyethylene Glycol-Coated Superparamagnetic Magnetite Nanoparticles Alters Differently the Expressions of Genes Involved in Iron Metabolism in the Liver and Heart of Rats
Source: MDPI journal article supplement (doi:10.3390/pharmaceutics15051475), 2023-05-12
Supplement: s1 [file s1]

## **A single infusion of polyethylene glycol-coated superparamagnetic magnetite nanoparticles alters differently the expressions of genes involved in iron metabolism in the liver and heart of rats**

Michal Kluknavsky<sup>1x</sup>, Andrea Micurova<sup>1x</sup>, Martin Skratek<sup>2</sup>, Peter Balis<sup>1</sup>, Monika Okuliarova<sup>3</sup>, Jan Manka<sup>2</sup>, Iveta Bernatova<sup>1\*</sup>

### **Table S1. Correlations of the gene expressions in the livers and left heart ventricles of rats**

#### **Abbreviations**

*LHV*: left heart ventricle, *Nos3*: endothelial nitric oxide synthase, *Nos2*: inducible nitric oxide synthase, *Nfe2l2*: nuclear factor (erythroid-derived 2)-like 2, *Pparg*: peroxisome proliferator-activated receptor gamma, *Sod1*: superoxide dismutase 1, *Sod2*: superoxide dismutase 2, *Gpx4*: glutathione peroxidase 4, *Dmt1*: divalent metal transporter, *Tf*: transferrin, *Tfr1*: transferrin receptor, *Fth1*: ferritin heavy chain 1, *Fpn*: ferroportin, *Irp1 (Aco1)*: iron-regulatory protein 1 or aconitase 1, *Hamp*: hepcidin.

| Liver<br>n = 24 | <i>Fth1</i>            | <i>Dmt1</i>            | <i>Tfr1</i>           | <i>Tf</i>             | <i>Fpt</i>            | <i>Irp1</i>            | <i>Hamp</i>            | <i>Gpx4</i>            | <i>Sod2</i>            | <i>Sod1</i>             | <i>Nos2</i>            | <i>Nos3</i>            | <i>Pparg</i>            |                         | LHV<br>n = 24 |
|-----------------|------------------------|------------------------|-----------------------|-----------------------|-----------------------|------------------------|------------------------|------------------------|------------------------|-------------------------|------------------------|------------------------|-------------------------|-------------------------|---------------|
| <i>Nfe2l2</i>   |                        | r = 0.76<br>p < 0.0001 |                       |                       |                       |                        |                        | r = 0.73<br>p < 0.0001 | r = 0.52<br>p < 0.001  |                         | r = 0.68<br>p < 0.0003 | r = 0.77<br>p < 0.0001 | r = 0.84<br>p < 0.0001  |                         |               |
| <i>Pparg</i>    |                        | r = 0.51<br>p < 0.01   |                       | r = -0.50<br>p < 0.02 |                       |                        |                        | r = 0.70<br>p < 0.001  |                        |                         | r = 0.73<br>p < 0.0001 | r = 0.53<br>p < 0.01   |                         | r = -0.83<br>p < 0.0001 | <i>Dmt1</i>   |
| <i>Nos3</i>     |                        | r = 0.95<br>p < 0.0001 |                       |                       |                       |                        |                        | r = 0.72<br>p < 0.0001 |                        |                         | r = 0.65<br>p < 0.001  |                        | r = -0.41<br>p < 0.05   |                         | <i>Tfr1</i>   |
| <i>Nos2</i>     |                        | r = 0.56<br>p < 0.005  |                       |                       |                       |                        |                        | r = 0.80<br>p < 0.0001 |                        |                         |                        |                        | r = -0.51<br>p < 0.02   | r = 0.61<br>p < 0.002   | <i>Tf</i>     |
| <i>Sod1</i>     | r = 0.84<br>p < 0.0001 |                        |                       | r = 0.67<br>p < 0.001 |                       |                        |                        |                        | r = 0.52<br>p < 0.01   |                         | r = 0.63<br>p < 0.001  | r = 0.46<br>p < 0.03   | r = -0.74<br>p < 0.0001 | r = 0.71<br>p < 0.0001  | <i>Fpt</i>    |
| <i>Sod2</i>     | r = 0.47<br>p < 0.03   |                        |                       |                       |                       |                        |                        |                        |                        | r = 0.55<br>p < 0.006   | r = 0.44<br>p < 0.04   |                        | r = -0.69<br>p < 0.0003 | r = 0.72<br>p < 0.0001  | <i>Irp1</i>   |
| <i>Gpx4</i>     |                        | r = 0.61<br>p < 0.002  |                       |                       |                       |                        |                        |                        |                        |                         |                        |                        |                         | r = 0.51<br>p < 0.02    | <i>Hamp</i>   |
| <i>Hamp</i>     |                        |                        |                       |                       |                       |                        |                        |                        |                        | r = -0.63<br>p < 0.0001 |                        | r = -0.52<br>p < 0.01  | r = 0.70<br>p < 0.0002  | r = -0.58<br>p < 0.004  | <i>Gpx4</i>   |
| <i>Irp1</i>     |                        |                        | r = 0.72<br>p < 0.001 |                       | r = 0.70<br>p < 0.001 |                        |                        | r = 0.61<br>p < 0.002  | r = 0.52<br>p < 0.01   |                         |                        |                        | r = -0.52<br>p < 0.009  | r = 0.57<br>p < 0.004   | <i>Sod2</i>   |
| <i>Fpt</i>      |                        |                        | r = 0.54<br>p < 0.01  |                       |                       |                        | r = -0.60<br>p < 0.002 |                        | r = 0.46<br>p < 0.03   | r = 0.59<br>p < 0.003   | r = 0.49<br>p < 0.02   |                        | r = -0.51<br>p < 0.02   | r = 0.63<br>p < 0.001   | <i>Sod1</i>   |
| <i>Tf</i>       | r = 0.69<br>p < 0.001  |                        |                       |                       |                       |                        |                        |                        | r = -0.54<br>p < 0.007 | r = -0.41<br>p < 0.05   | r = -0.44<br>p < 0.03  |                        | r = 0.63<br>p < 0.002   | r = -0.58<br>p < 0.004  | <i>Nos2</i>   |
| <i>Tfr1</i>     |                        |                        |                       | r = 0.51<br>p < 0.02  |                       | r = -0.56<br>p < 0.005 |                        |                        | r = -0.48<br>p < 0.02  |                         |                        |                        | r = 0.46<br>p < 0.03    | r = -0.44<br>p < 0.04   | <i>Nos3</i>   |
| <i>Dmt1</i>     |                        |                        |                       |                       |                       |                        |                        |                        |                        |                         |                        |                        |                         |                         | <i>Pparg</i>  |
|                 |                        | r = 0.79<br>p < 0.0001 |                       |                       |                       |                        |                        |                        |                        |                         |                        |                        |                         |                         | <i>Nfe2l2</i> |
| Liver<br>n = 24 |                        | <i>Pparg</i>           | <i>eNOS</i>           | <i>iNOS</i>           | <i>Sod1</i>           | <i>Sod2</i>            | <i>Gpx4</i>            | <i>Hamp</i>            | <i>Irp1</i>            | <i>Fpt</i>              | <i>Tf</i>              | <i>Tfr1</i>            | <i>Dmt1</i>             | <i>Fth1</i>             | LHV<br>n = 24 |
